# Supplementary figures and images for: N1-Benzyl substituted cambinol analogues as isozyme selective inhibitors of the sirtuin family of protein deacetylases
Source: Royal Society of Chemistry journal article supplement (doi:10.1039/c1md00023c), 2011-01-01

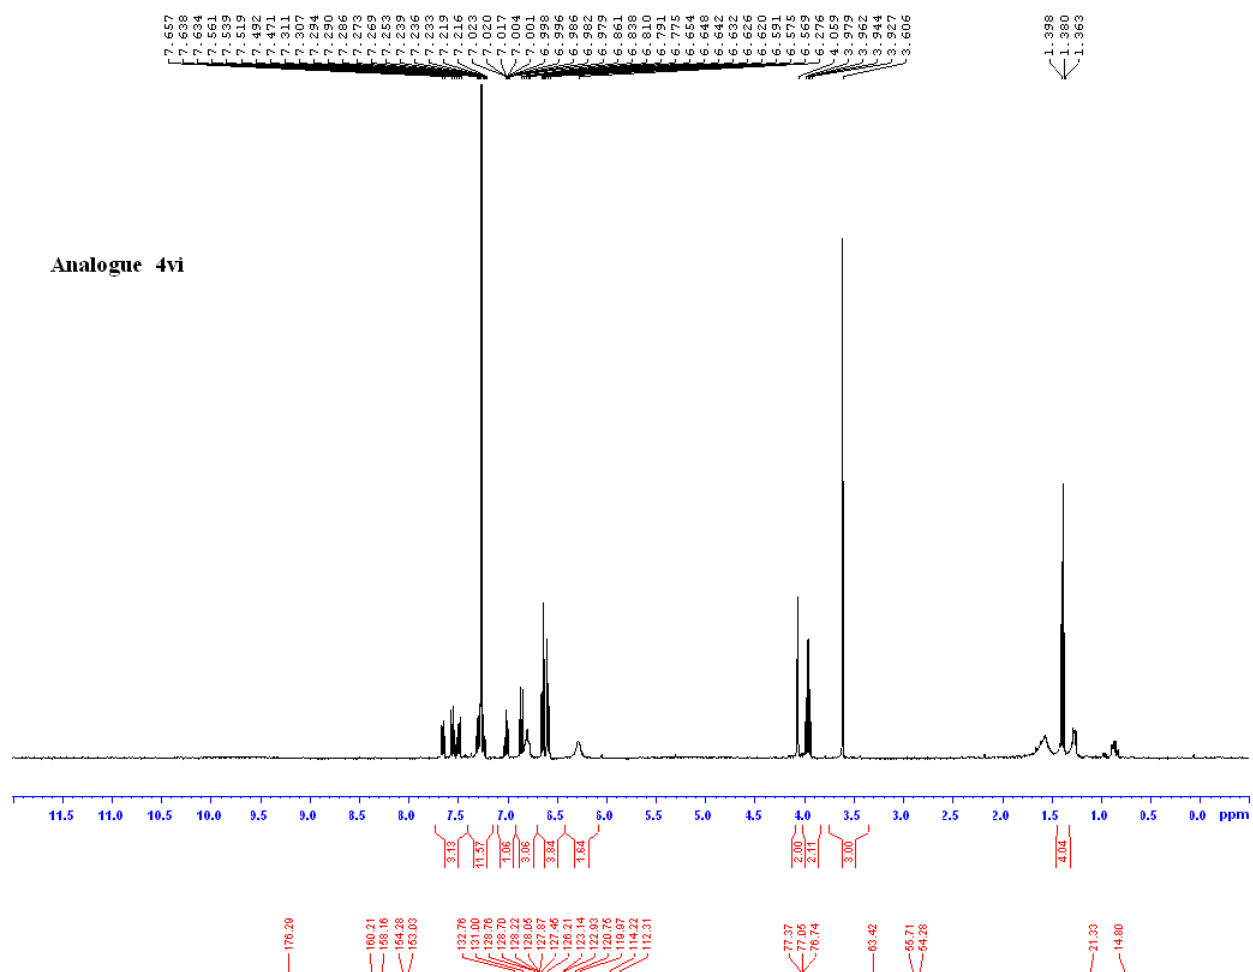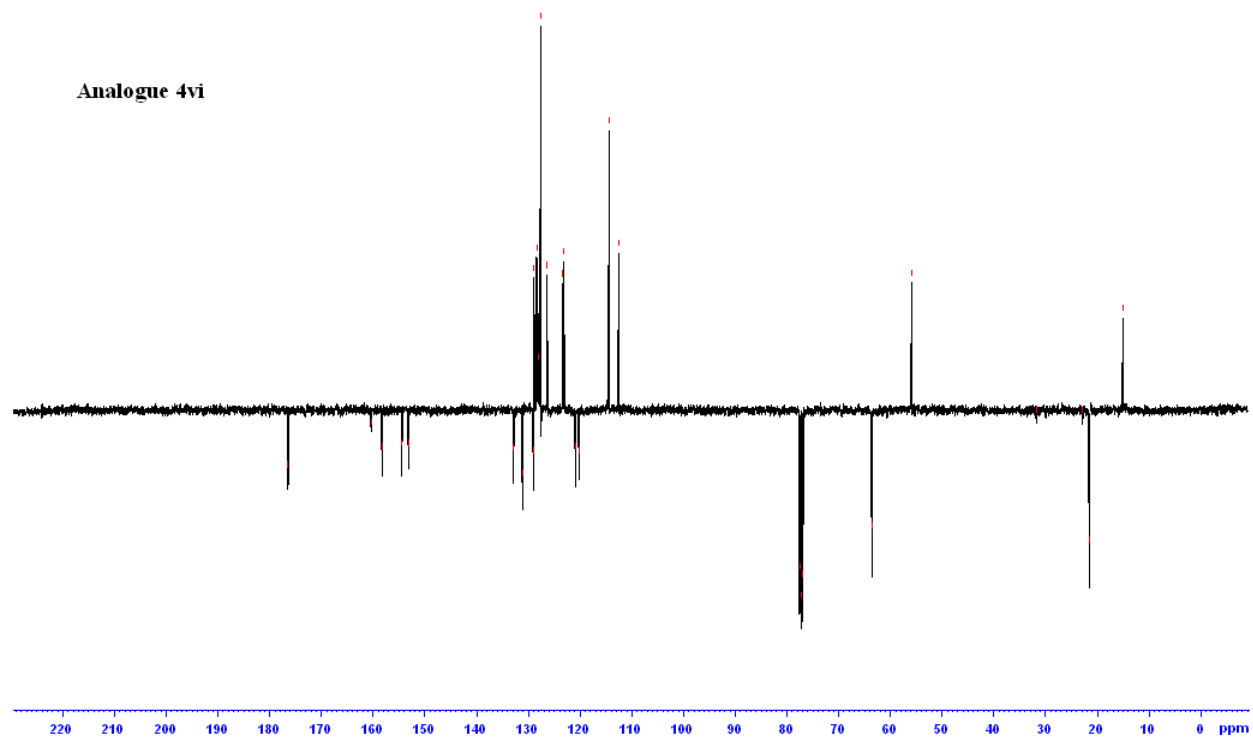

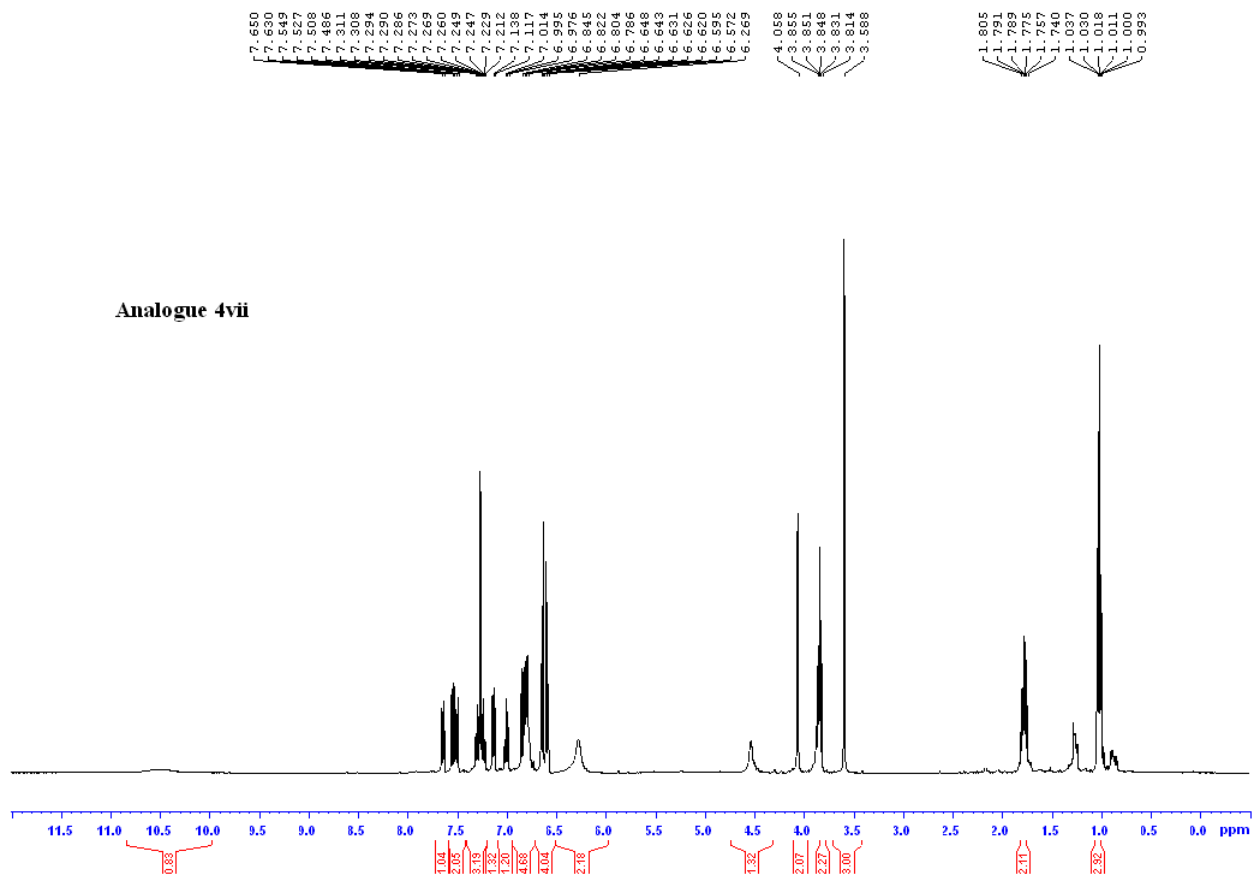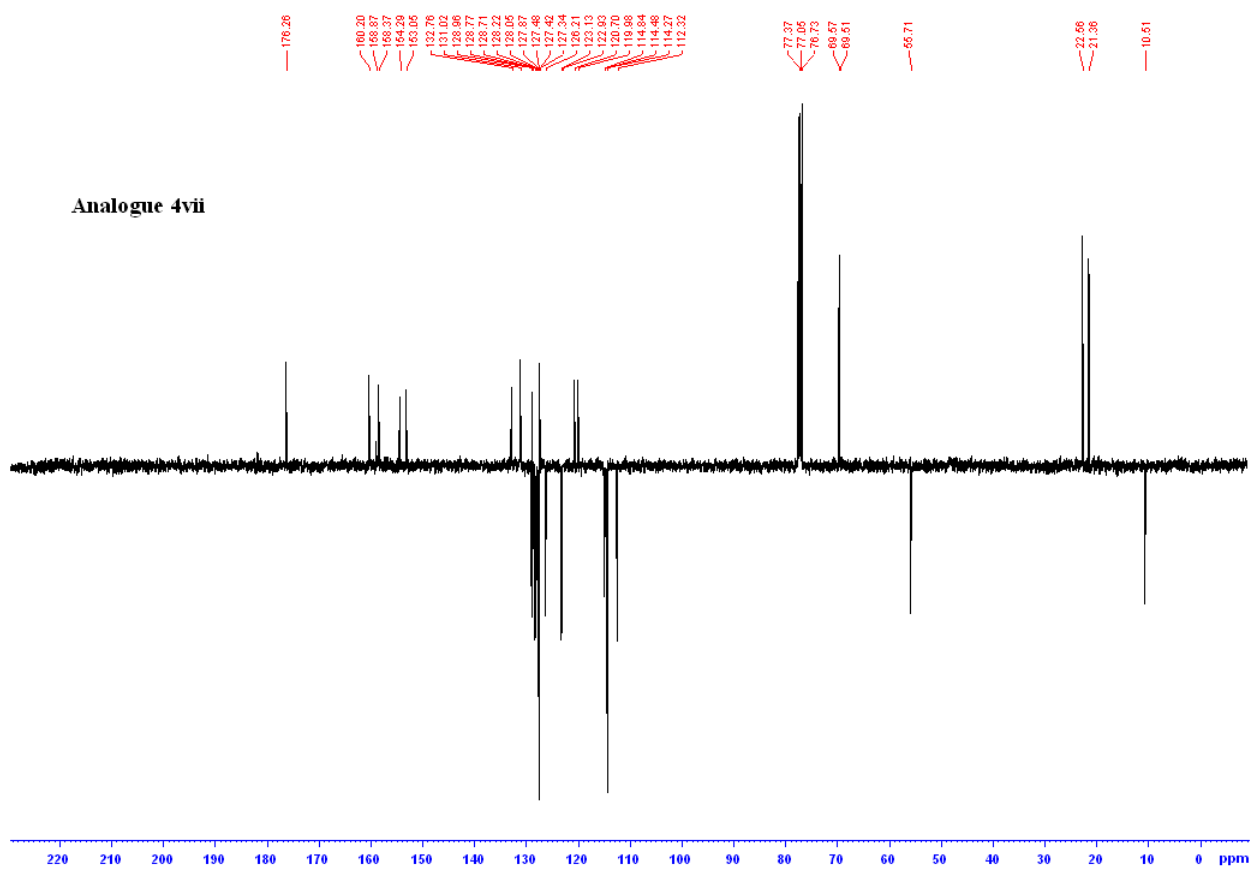

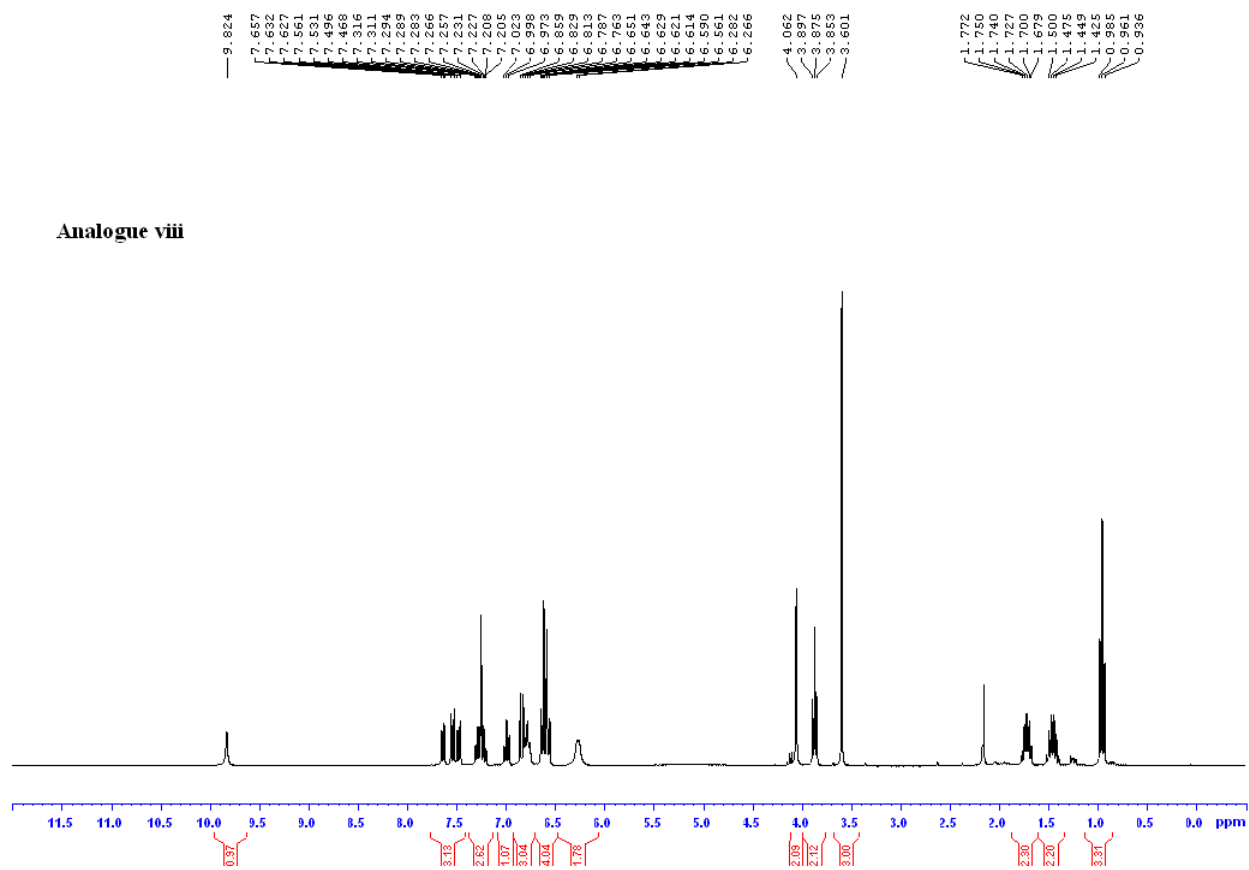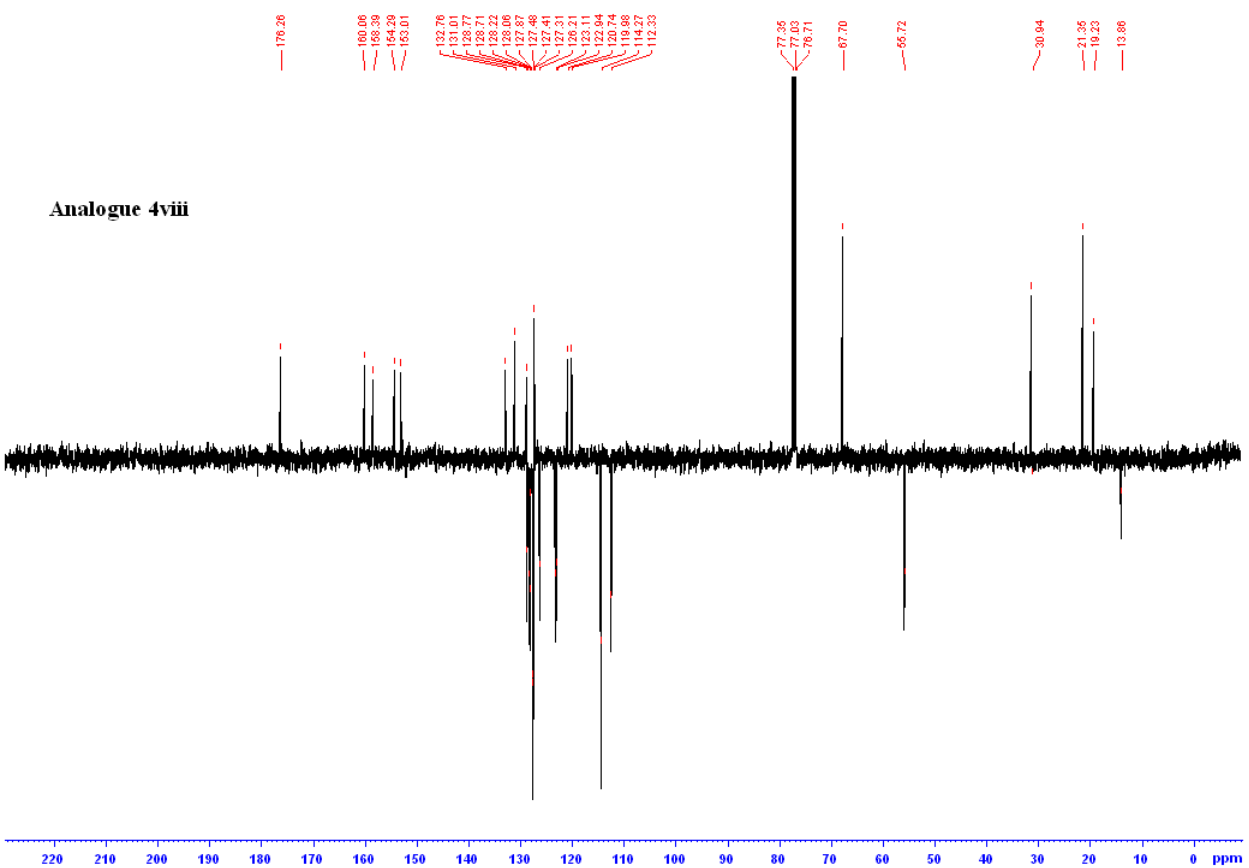

10.419  
7.537  
7.521  
7.459  
7.420  
7.401  
7.316  
7.301  
7.286  
7.258  
7.244  
7.228  
7.215  
7.204  
7.202  
7.187  
7.185  
7.147  
7.141  
7.133  
7.124  
7.117  
7.026  
7.014  
7.009  
7.000  
6.990  
6.976  
6.962  
6.959  
6.853  
6.838  
6.823  
6.790  
6.772  
6.588  
6.562  
6.548  
6.060  
4.734  
4.037

Analogue 4ix

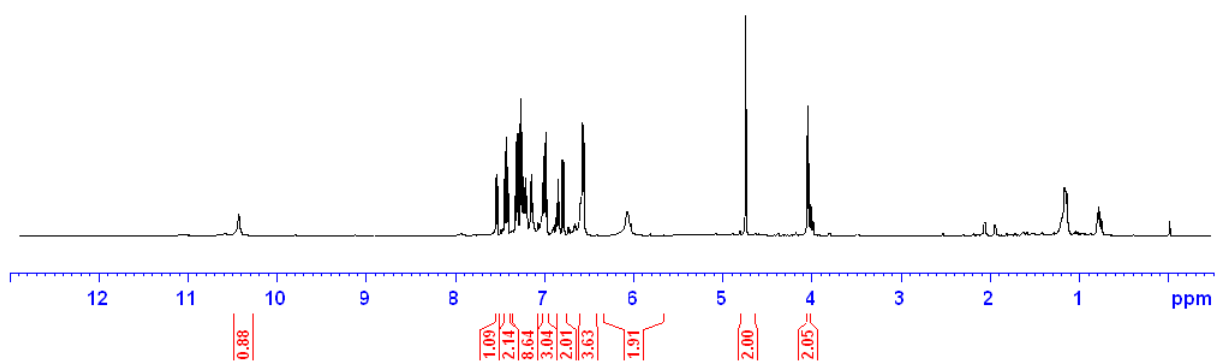

176.27  
160.47  
152.96  
137.07  
135.88  
132.81  
131.03  
128.84  
128.74  
128.62  
128.48  
128.40  
128.01  
127.99  
127.70  
127.63  
127.41  
126.24  
126.06  
123.27  
123.20  
123.10  
122.86  
120.68  
120.39  
113.35  
112.31  
77.44  
77.13  
76.81  
70.27  
21.86  
21.98

Analogue 4ix

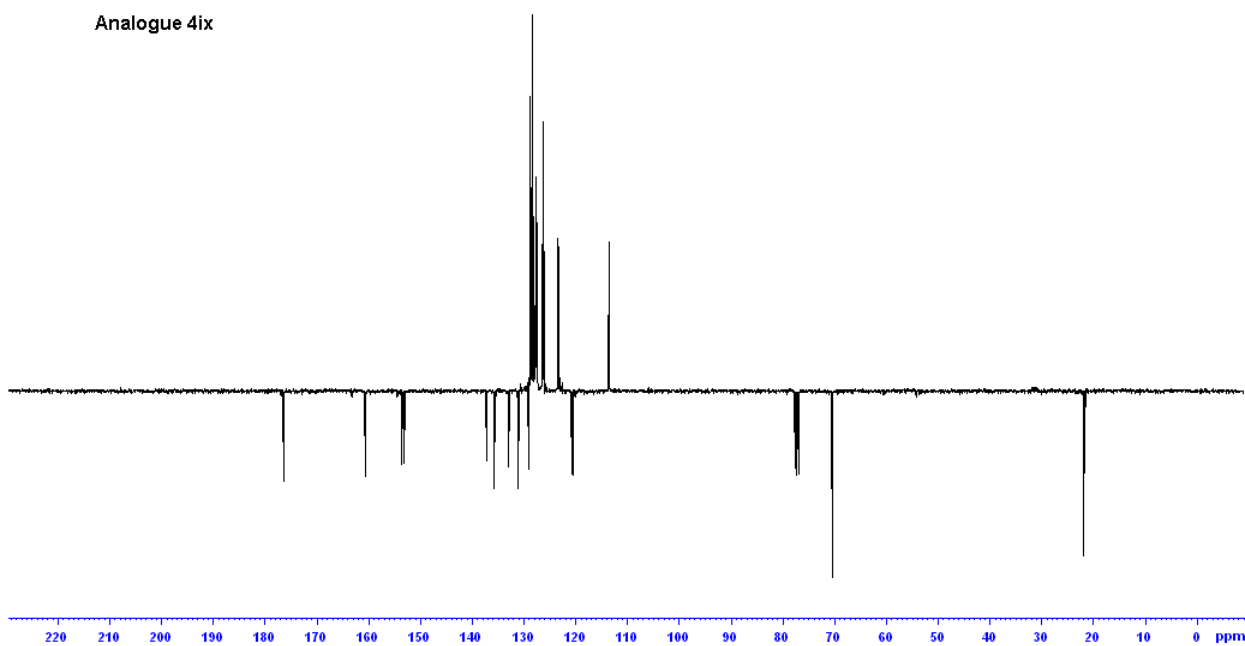

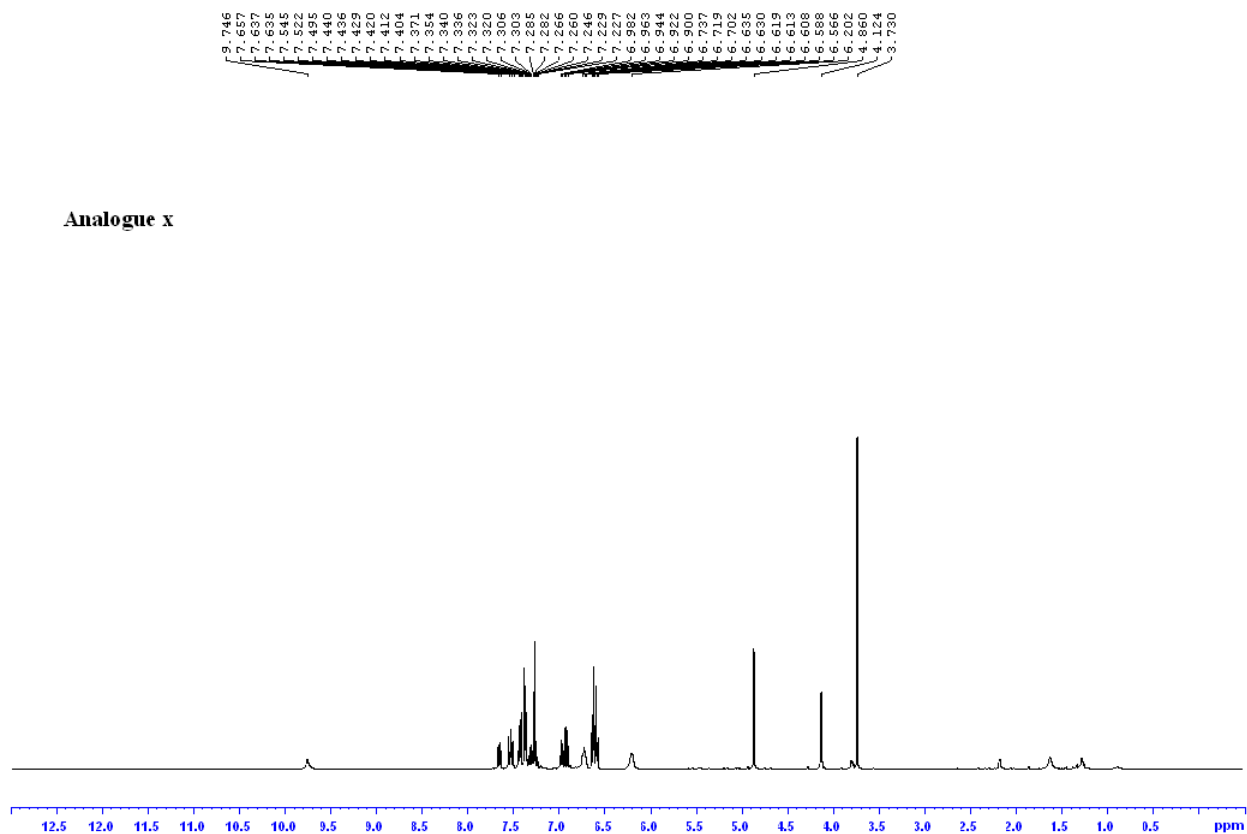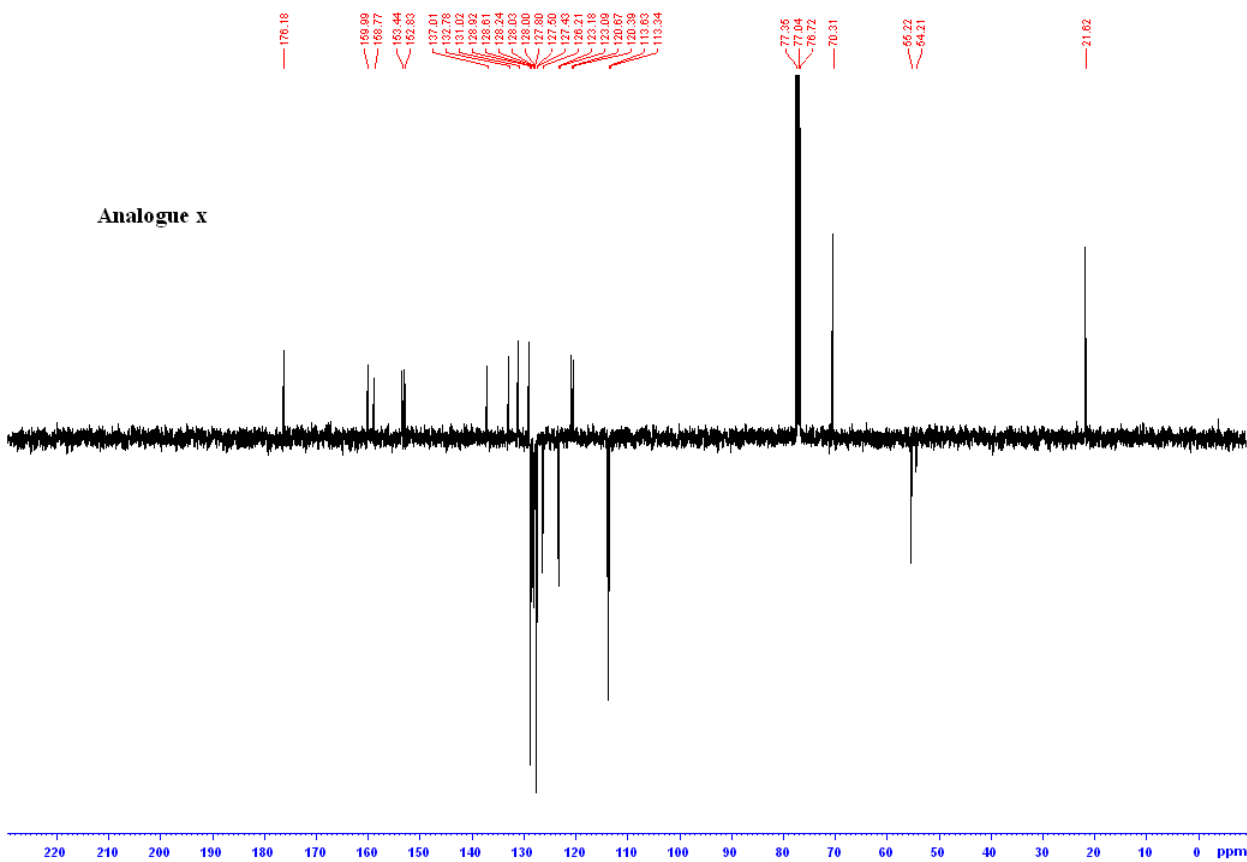

Supplement: c1md00023c_3.pdf [file c1md00023c_3.pdf]

9.581  
7.662  
7.683  
7.583  
7.550  
7.503  
7.482  
7.417  
7.402  
7.368  
7.353  
7.312  
7.288  
7.285  
7.277  
7.274  
7.268  
7.258  
7.254  
7.224  
6.974  
6.955  
6.936  
6.920  
6.897  
6.712  
6.650  
6.598  
6.583  
6.191  
4.855  
4.128  
4.112  
3.963  
3.946  
3.928  
3.911

1.389  
1.371  
1.354

Analogue 4xi

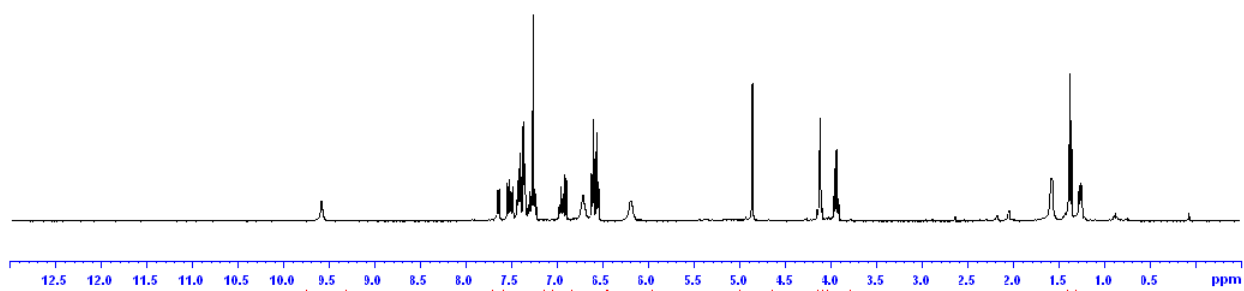

Analogue 4xi

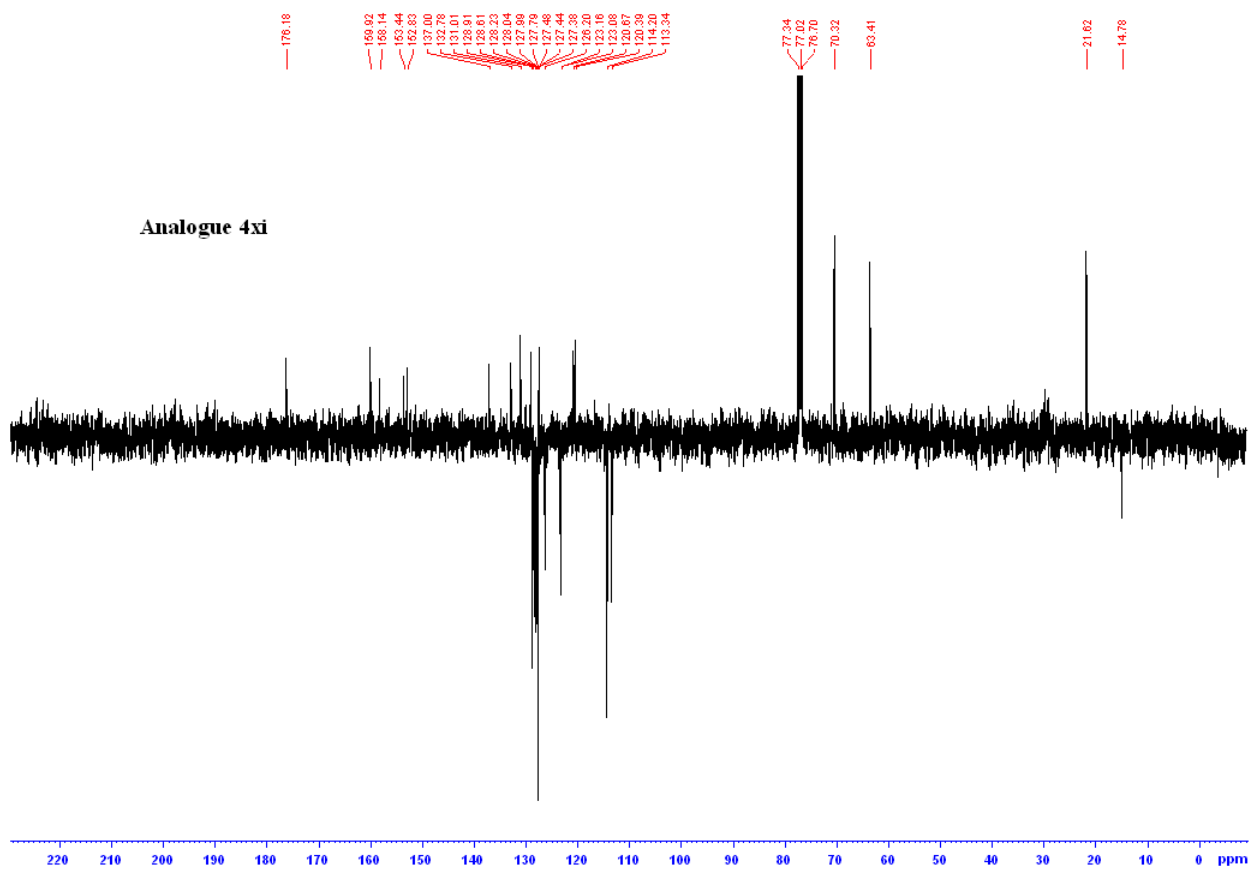

Analogue 4xii

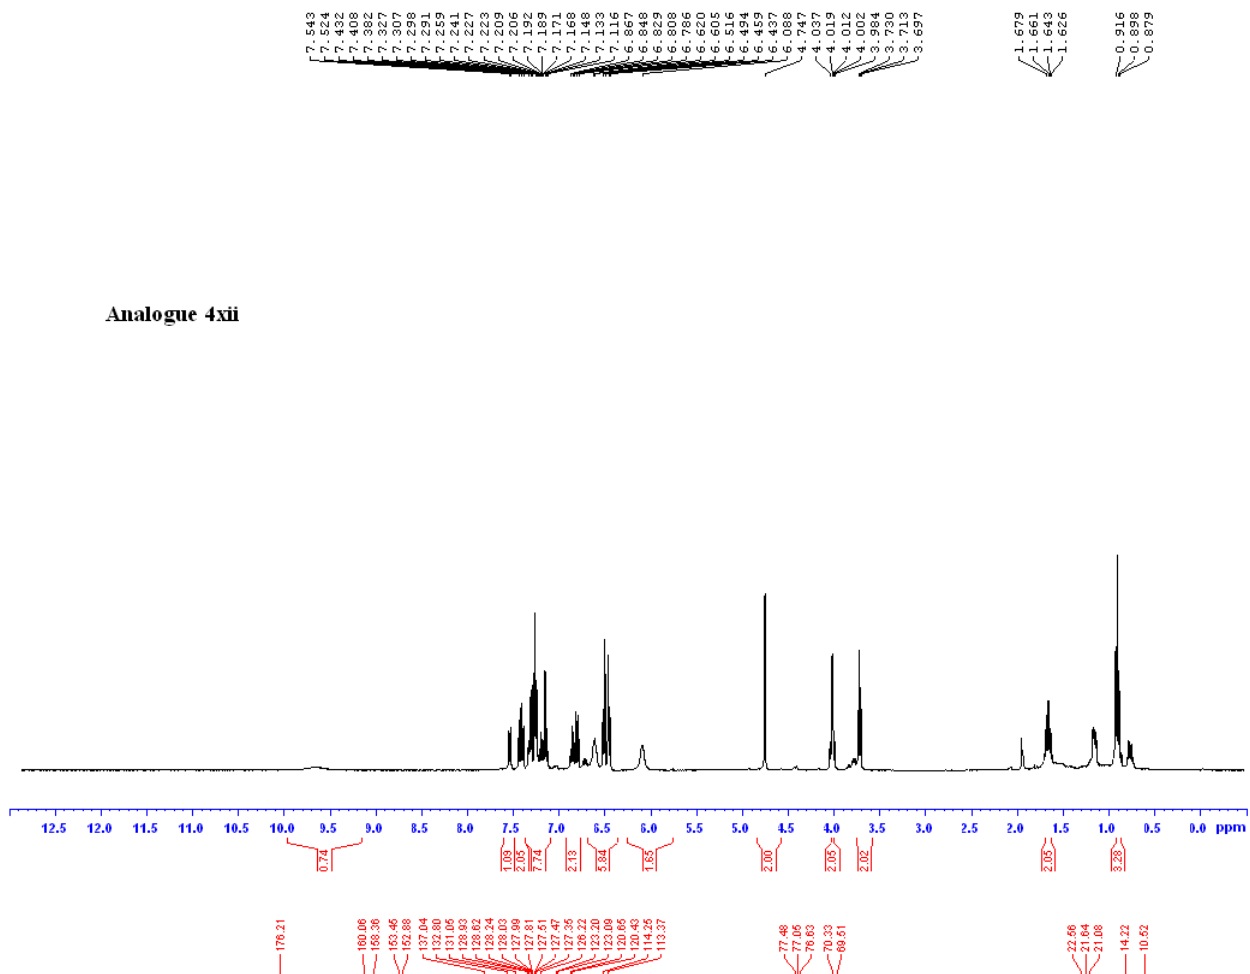

Analogue 4xii

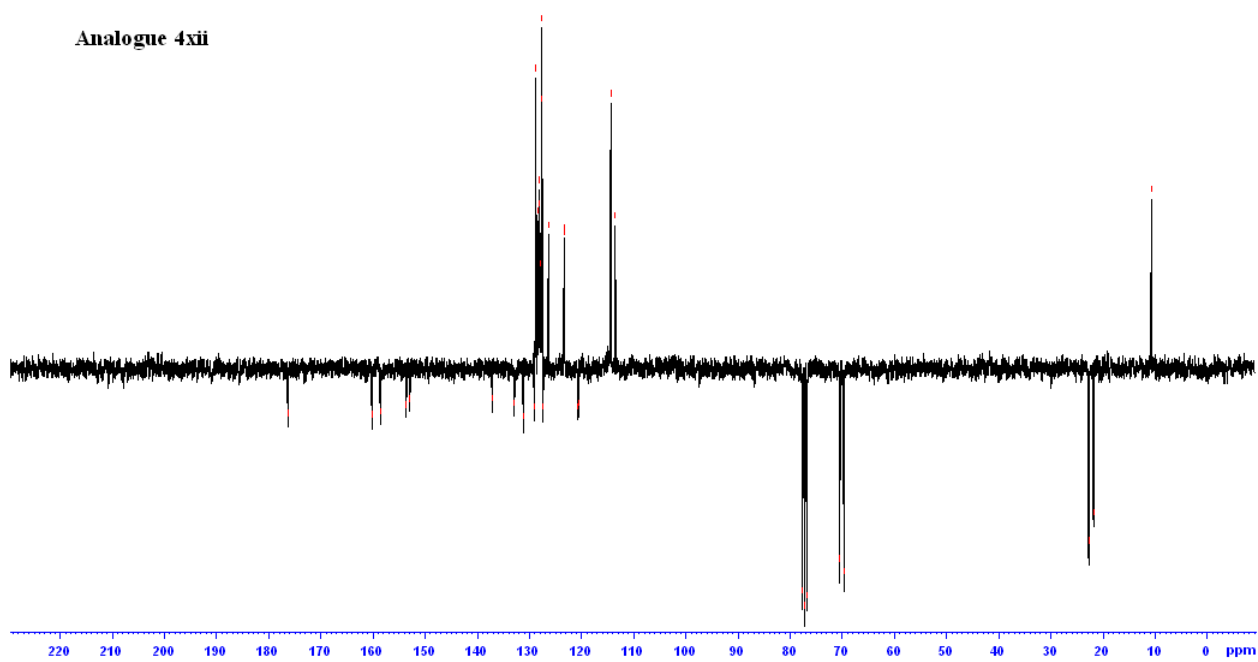

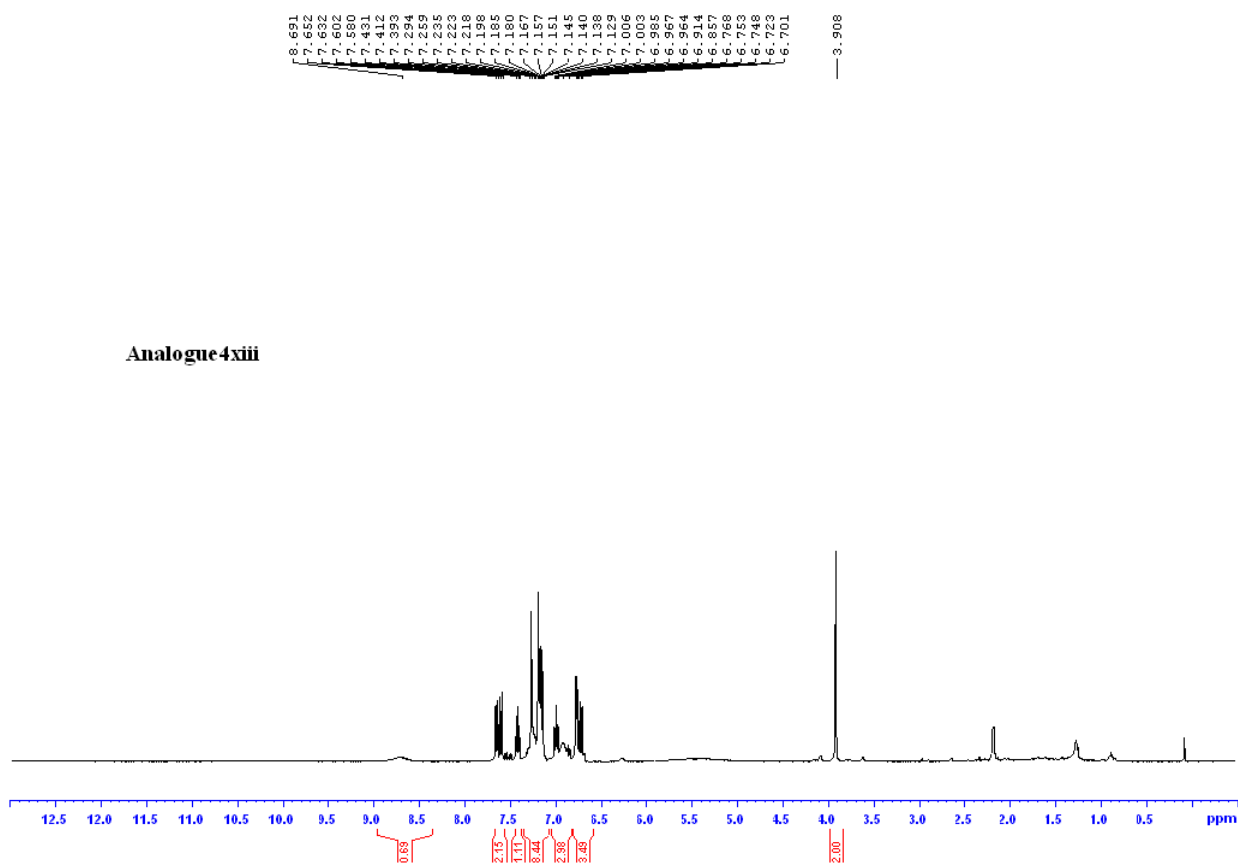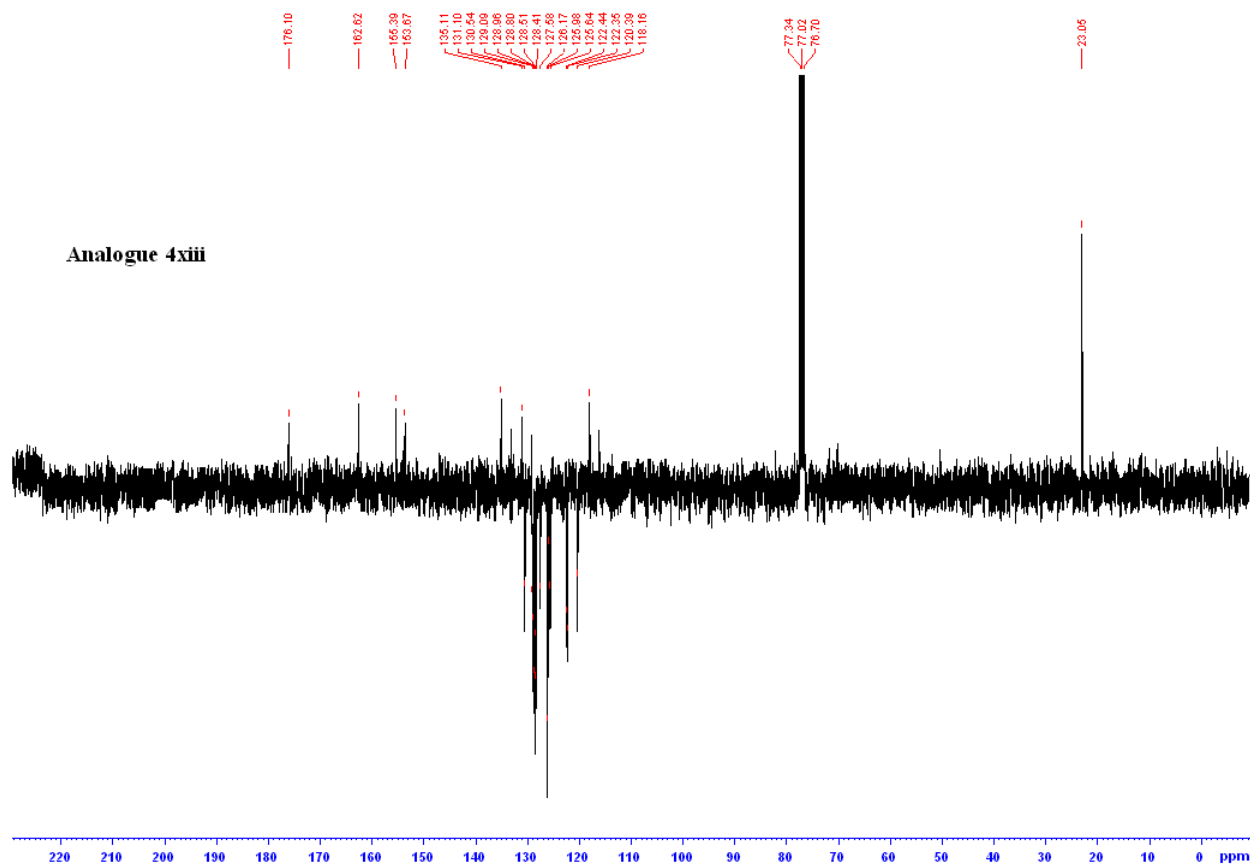

Analogue 4xiv

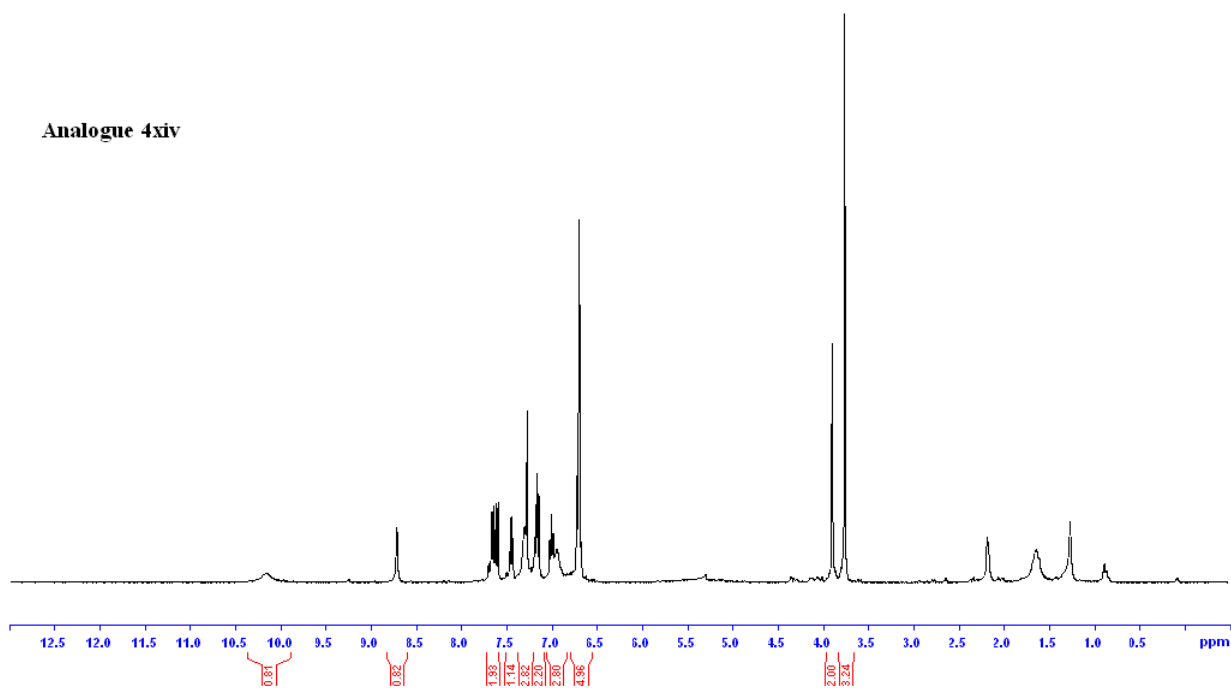

Analogue 4xiv

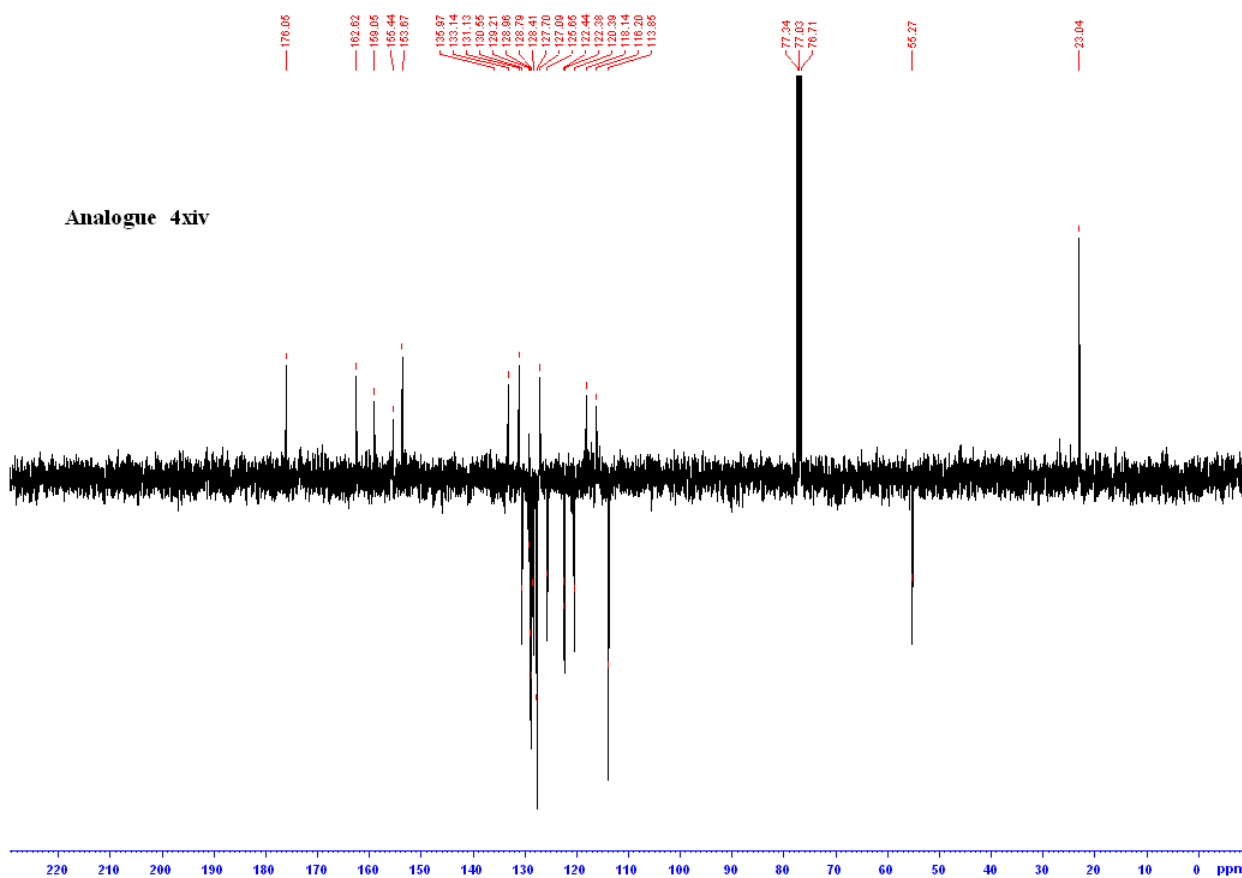

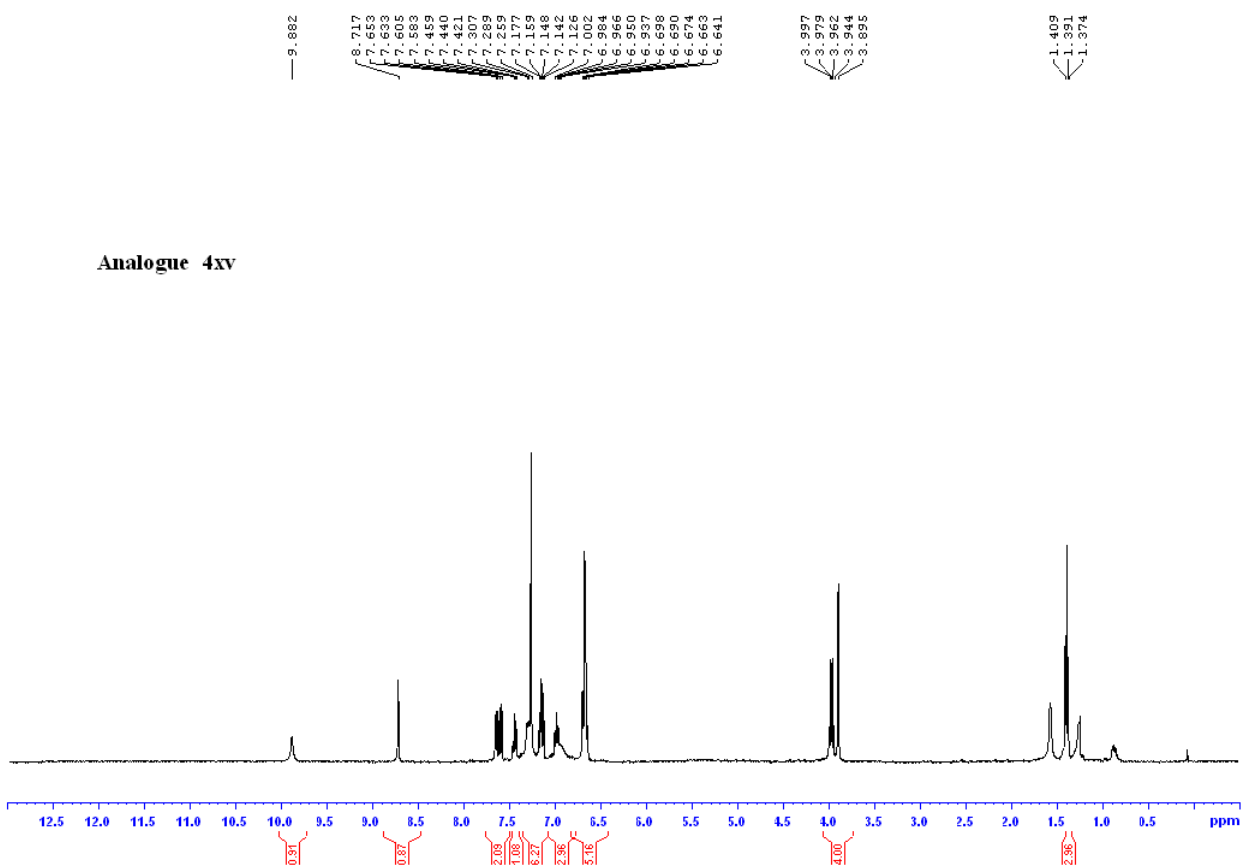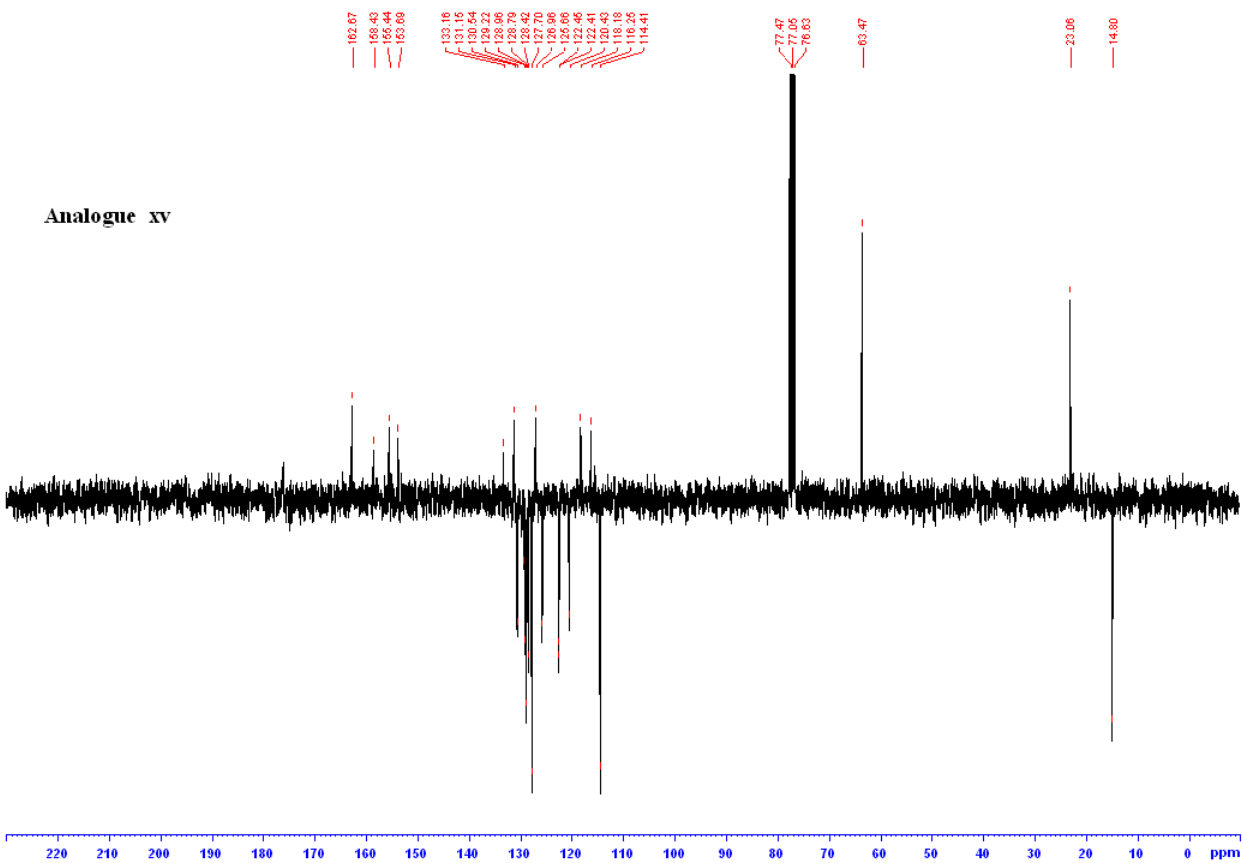

Supplement: c1md00023c_4.pdf [file c1md00023c_4.pdf]
